# Supplementary material for: Ultrafast synthesis of SAPO-17 zeolites with excellent CO2/N2and CO2/CH4separation performance
Source: Royal Society of Chemistry journal article supplement (doi:10.1039/d3qi00703k), 2023-01-01
Supplement: d3qi00703k1.pdf [file d3qi00703k1.pdf]

**Ultrafast synthesis of SAPO-17 zeolites with excellent CO<sub>2</sub>/N<sub>2</sub> and CO<sub>2</sub>/CH<sub>4</sub>  
separation performance**

Chaoran Wang,<sup>a</sup> Xiao Li,<sup>a</sup> Shiyue Liu,<sup>a</sup> Tingting Wang,<sup>a</sup> Puxu Liu,<sup>b</sup> Xiaowei Song<sup>\*a</sup>,  
and Zhiqiang Liang<sup>\*a</sup>

<sup>a</sup>*State Key Laboratory of Inorganic Synthesis and Preparative Chemistry, College of  
Chemistry, Jilin University, 2699 Qianjin Street, Changchun 130012, P. R. China*

<sup>b</sup>*College of Chemistry and Chemical Engineering, Shanxi Key Laboratory of Gas  
Energy Efficient and Clean Utilization, Taiyuan University of Technology, Taiyuan  
030024, Shanxi, China*

\*Corresponding Authors.

E-mail addresses: [xiaoweisong@jlu.edu.cn](mailto:xiaoweisong@jlu.edu.cn) (X. W. Song), [liangzq@jlu.edu.cn](mailto:liangzq@jlu.edu.cn) (Z. Q.  
Liang).

### Section 1 Calculation of $Q_{st}$

$$\ln P = \ln N + \frac{1}{T} \sum_{i=0}^m a_i N^i + \sum_{j=0}^n b_j N^j$$

$$Q_{st} = -R \sum_{i=0}^m a_i N^i$$

Where  $N$  represents the adsorption capacity ( $\text{cm}^3/\text{g}$ ),  $P$  is the pressure (mmHg),  $T$  is the temperature (K),  $a_i$  and  $b_j$  are constants, and  $R$  is 8.314 J/mol/K.

### Section 2 Langmuir Freundlich formula

$$q = q_{m1} \frac{b_1 P^{\frac{1}{C_1}}}{1 + b_1 P^{\frac{1}{C_1}}} + q_{m2} \frac{b_2 P^{\frac{1}{C_2}}}{1 + b_2 P^{\frac{1}{C_2}}}$$

Where  $p$  is the pressure of the gas when the adsorption reaches equilibrium (kPa);  $q$  is the adsorption capacity per unit mass of adsorbent (mol/kg),  $q_{m1}$  and  $q_{m2}$  are the saturated capacity of component 1 and component 2 (mol/kg), respectively;  $b_1$  and  $b_2$  represent the affinity coefficients of component 1 and component 2 (1/kPa);  $C_1$  and  $C_2$  are deviations from the ideal uniform surface.

Separation factor ( $S$ )

$$S = \frac{q_1/q_2}{P_1/P_2}$$

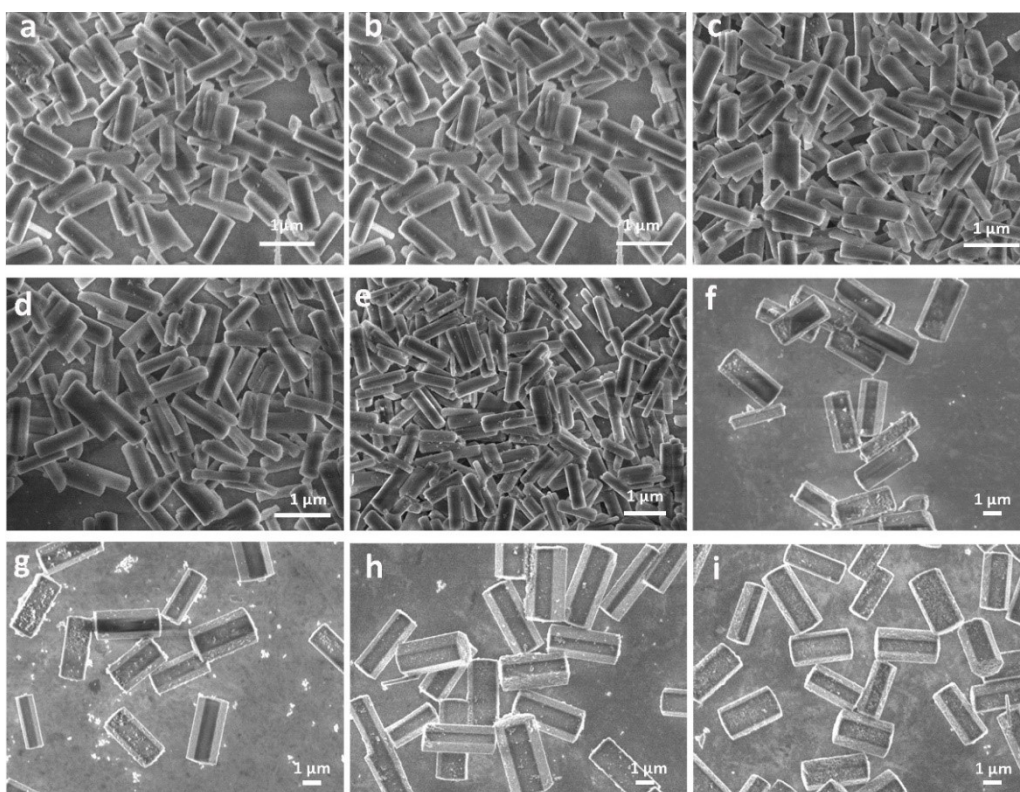

**Fig. S1** Scanning electron microscopy (SEM) images of SAPO-17-S-3 (a), SAPO-17-S-5 (b), SAPO-17-S-10 (c), SAPO-17-S-15 (d), SAPO-17-S-30 (e), SAPO-17-S-60 (f), SAPO-17-S-120 (g), SAPO-17-S-180 (i).

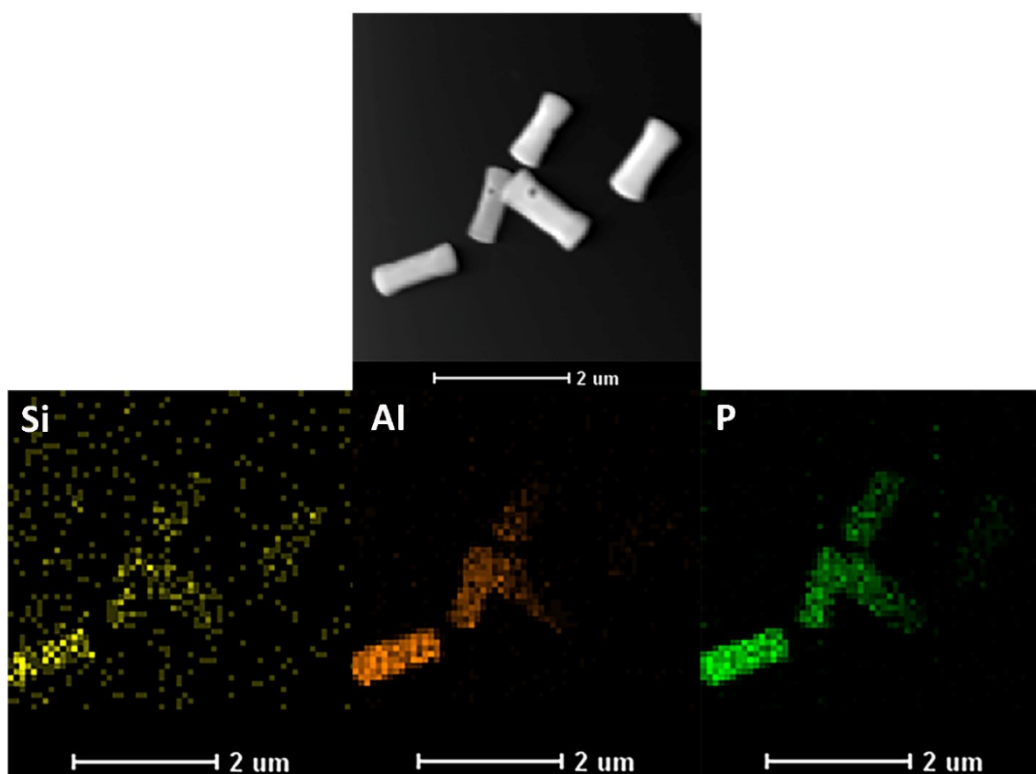

**Fig. S2** Energy dispersion spectrometer (EDS) mapping of SAPO-17-S-1.

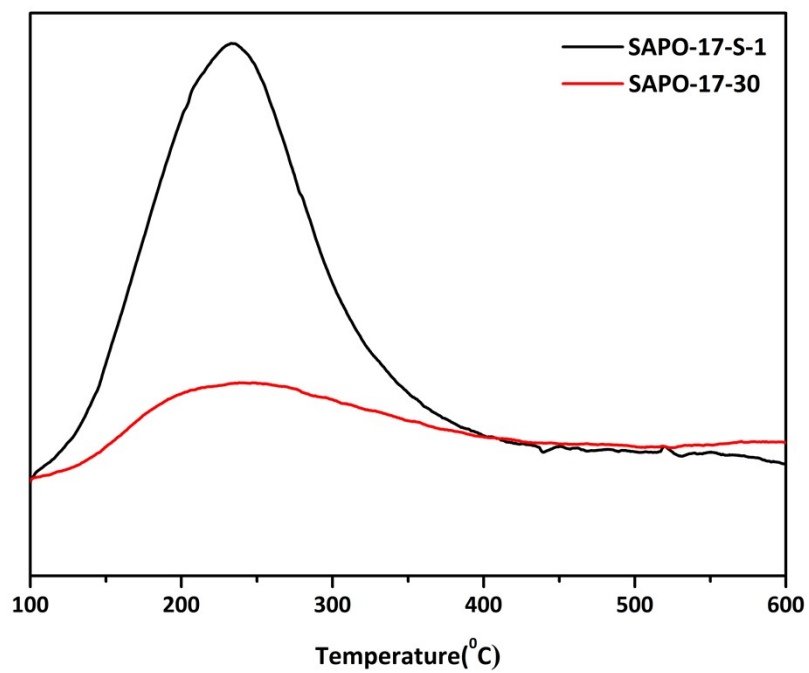

**Fig. S3** Ammonium temperature-programmed desorption (NH<sub>3</sub>-TPD) profile of synthesized SAPO-17-S-1 and SAPO-17-30.

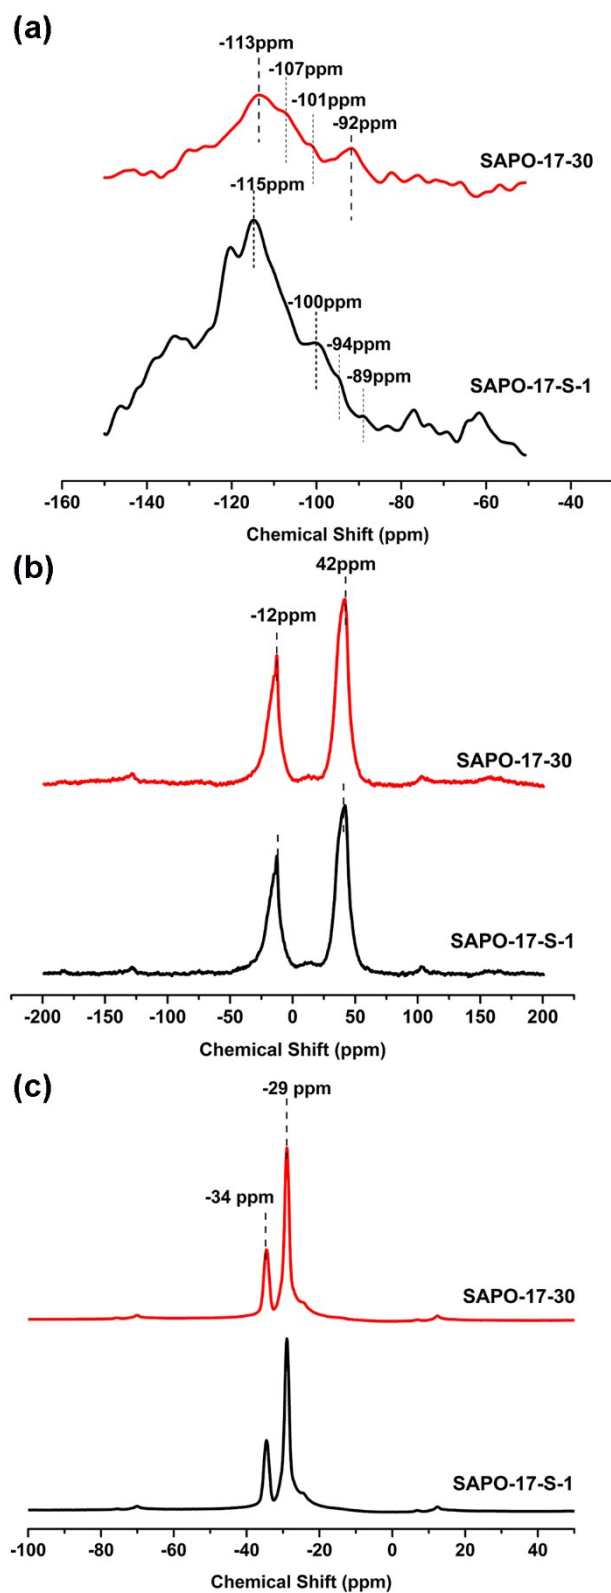

**Fig. S4**  $^{29}\text{Si}$  MAS NMR spectra (a),  $^{27}\text{Al}$  MAS NMR spectra (b) and  $^{31}\text{P}$  MAS NMR spectra (c) of SAPO-17-S-1 and SAPO-17-30 samples.

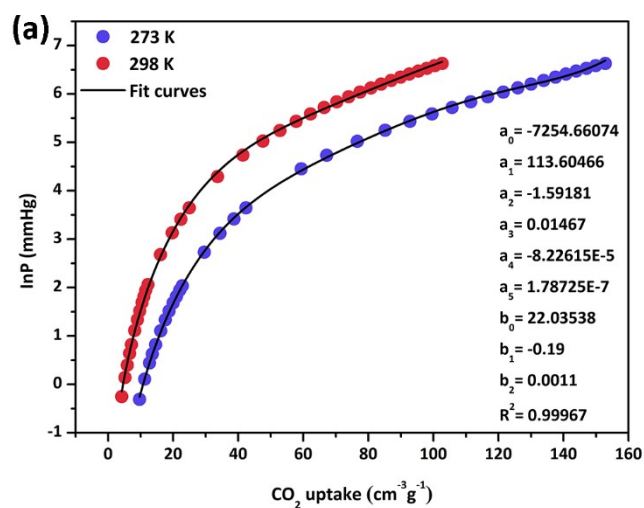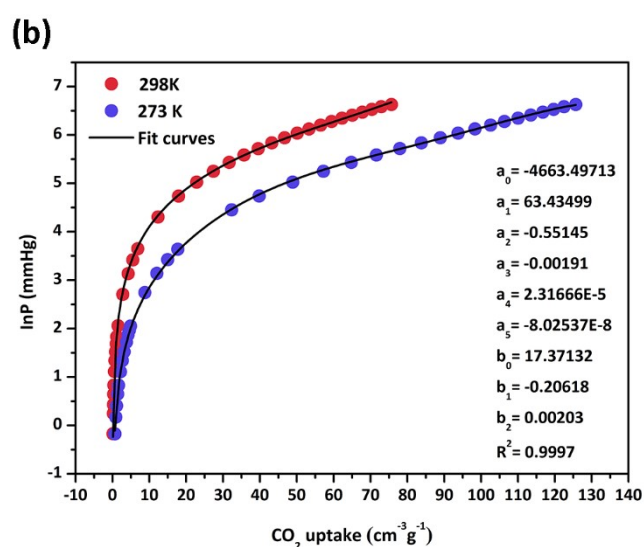

Fig. S5 Virial fitting for  $\text{CO}_2$  of SAPO-17-S-1 (a) and SAPO-17-30 (b).

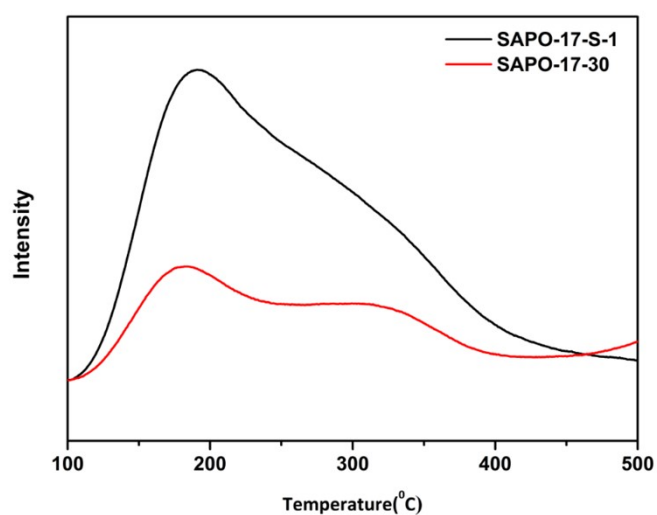

Fig. S6  $\text{CO}_2$ -TPD profile of synthesized SAPO-17-S-1 and SAPO-17-30.

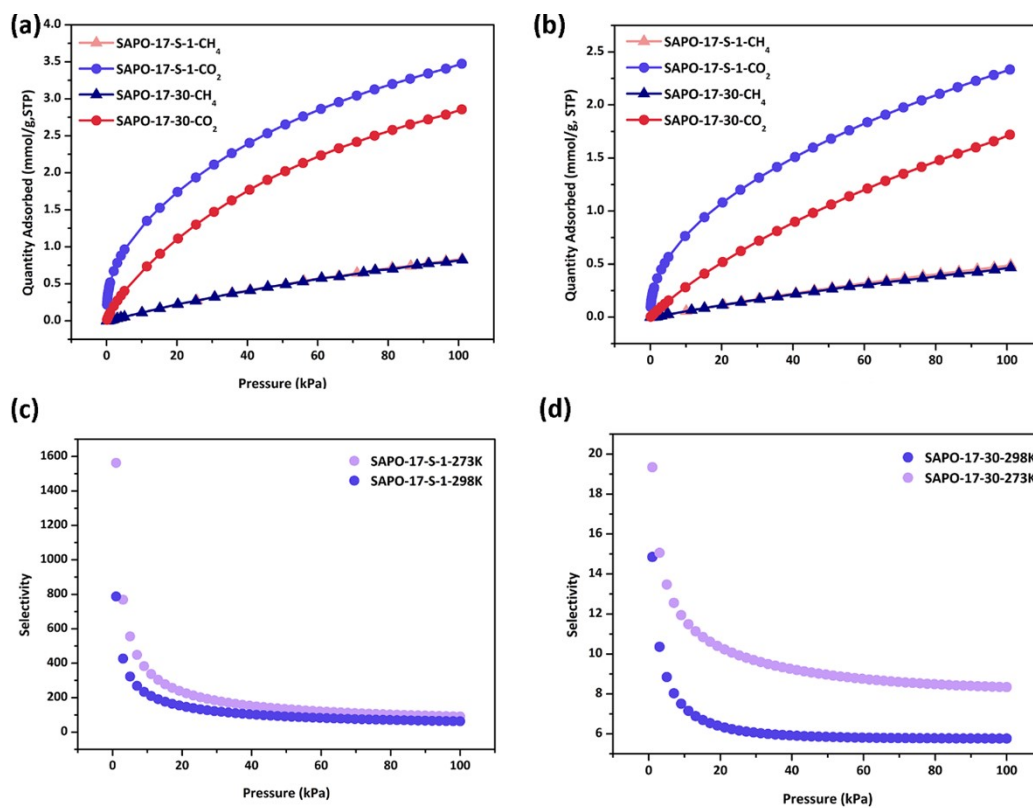

**Fig. S7** CO<sub>2</sub>, CH<sub>4</sub> adsorption-desorption isotherms of SAPO-17-S-1 and SAPO-17-30 at 273 K (a), 298 K (b), CO<sub>2</sub>/CH<sub>4</sub> selectivity of SAPO-17-S-1 (c), SAPO-17-30 (d) at 273 K, 298 K.

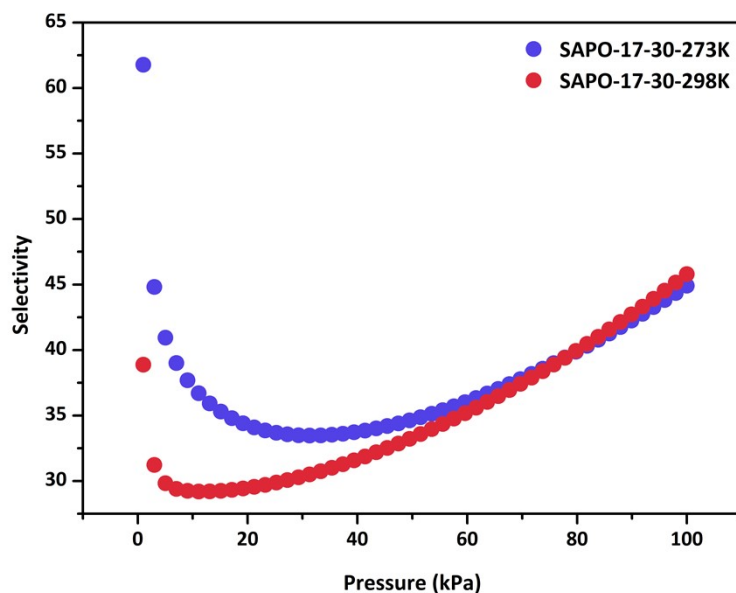

**Fig. S8** CO<sub>2</sub>/N<sub>2</sub> IAST selectivity of SAPO-17-30 at 273 K and 298 K.

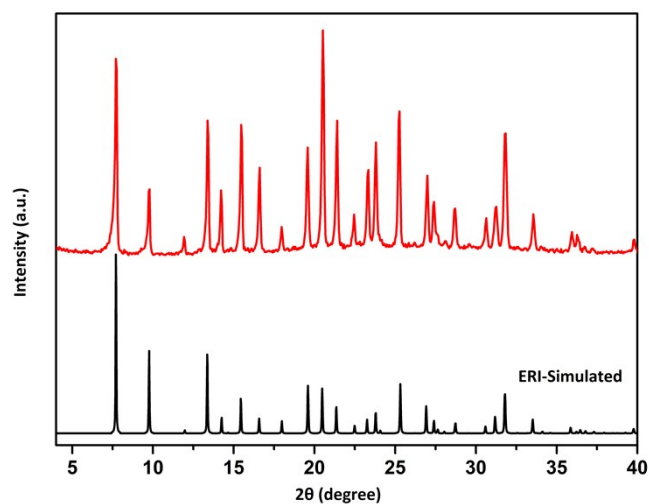

**Fig. S9** XRD patterns of sample SAPO-17-S-1 after granulation.

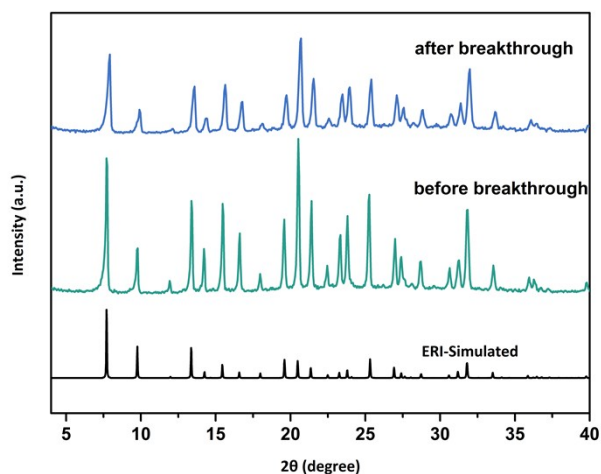

**Fig. S10** XRD patterns of SAPO-17-S-1 before and after breakthrough experiments.

**Table S1** The textural properties of SAPO-17-30, SAPO-17-180 and SAPO-17-S-1.

| Sample      | Si/(Si+Al+P) | $S_{\text{BET}}^a$   | $S_{\text{micro}}^b$ | $S_{\text{ext}}^b$   | $V_{\text{micro}}^b$  | $V_{\text{total}}^c$  |
|-------------|--------------|----------------------|----------------------|----------------------|-----------------------|-----------------------|
|             |              | /(m <sup>2</sup> /g) | /(m <sup>2</sup> /g) | /(m <sup>2</sup> /g) | /(cm <sup>3</sup> /g) | /(cm <sup>3</sup> /g) |
| SAPO-17-30  | 0.038        | 511                  | 478                  | 33                   | 0.23                  | 0.24                  |
| SAPO-17-180 | 0.037        | 524                  | 482                  | 42                   | 0.23                  | 0.25                  |
| SAPO-17-S-1 | 0.04         | 594                  | 547                  | 47                   | 0.26                  | 0.29                  |

<sup>a</sup>  $S_{\text{BET}}$  was calculated by BET equation from the linear part of adsorption isotherm ( $0.05 < P / P_0 < 0.30$ ).

<sup>b</sup>  $S_{\text{micro}}$ ,  $S_{\text{ext}}$  and  $V_{\text{micro}}$  are calculated by t-plot method.

<sup>c</sup>  $V_{\text{total}}$  is calculated at a pressure of  $P / P_0 = 0.95$



**Table S2** The fitting parameters of Dual-site Langmuir Freundlich formula for SAPO-17-S-1 at 273 K, 298 K.

| Temperature | 273 K           |                | 298 K           |                |
|-------------|-----------------|----------------|-----------------|----------------|
| Gas         | CO <sub>2</sub> | N <sub>2</sub> | CO <sub>2</sub> | N <sub>2</sub> |
| $q_{m1}$    | 0.96244         | 0.07031        | 0.17109         | 0.04089        |
| $b_1$       | 0.00269         | 0.0177         | 1.63771         | 0.00981        |
| $1/C_1$     | 1.54446         | 1.4077         | 0.57532         | 1.62833        |
| $q_{m2}$    | 67.31991        | 1.19658        | 16.13895        | 0.63961        |
| $b_2$       | 0.00768         | 6.45822E-4     | 0.01051         | 4.51902E-4     |
| $1/C_2$     | 0.36935         | 1.3493         | 0.58388         | 1.39483        |
| $R^2$       | 1               | 0.9999         | 1               | 0.99989        |

**Table S3** The fitting parameters of Dual-site Langmuir Freundlich formula for SAPO-17-30 at 273 K and 298 K.

| Temperature | 273 K           |                | 298 K           |                |
|-------------|-----------------|----------------|-----------------|----------------|
| Gas         | CO <sub>2</sub> | N <sub>2</sub> | CO <sub>2</sub> | N <sub>2</sub> |
| $q_{m1}$    | 4.72844         | 0.0501         | 0.42672         | 0.0129         |
| $b_1$       | 0.0113          | 0.00817        | 0.03616         | 0.0235         |
| $1/C_1$     | 1.02373         | 1.96655        | 0.99566         | 1.60555        |
| $q_{m2}$    | 0.20216         | 0.565          | 5.50477         | 0.27067        |
| $b_2$       | 0.39487         | 4.36652E-4     | 0.00314         | 8.66997E-4     |
| $1/C_2$     | 0.99644         | 1.61631        | 1.01147         | 1.37659        |
| $R^2$       | 0.99999         | 0.99972        | 0.99999         | 0.99973        |

**Table S4** Comparisons of CO<sub>2</sub> uptake and selectivity for the separation of CO<sub>2</sub>/N<sub>2</sub>, CO<sub>2</sub>/CH<sub>4</sub> on various zeolites and SAPOs.

| Material                  | Condition      | CO <sub>2</sub> uptake (mmol/g) | CH <sub>4</sub> uptake (mmol/g) | N <sub>2</sub> uptake (mmol/g) | <i>S</i> (CO <sub>2</sub> /CH <sub>4</sub> ) | <i>S</i> (CO <sub>2</sub> /N <sub>2</sub> ) | Ref.      |
|---------------------------|----------------|---------------------------------|---------------------------------|--------------------------------|----------------------------------------------|---------------------------------------------|-----------|
| SAPO-17-S-1 <sup>a</sup>  | 273 K, 101 kPa | 3.47                            | 0.83                            | 0.36                           | 91<br>(0.02/0.98 bar)                        | 280<br>(0.15/0.85 bar)                      | This work |
| SAPO-17-30 <sup>a</sup>   | 273 K, 101 kPa | 2.86                            | 0.82                            | 0.29                           | 5<br>(0.02/0.98 bar)                         | 44<br>(0.15/0.85 bar)                       | This work |
| SAPO-56 <sup>b</sup>      | 273 K, 101 kPa | 5.5                             | —                               | 0.52                           | —                                            | 10.5                                        | 1         |
| SAPO-17 <sup>b</sup>      | 273 K, 101 kPa | 3.3                             | —                               | 0.38                           | —                                            | 8.68                                        | 1         |
| SAPO-35_0.14 <sup>a</sup> | 273 K, 101 kPa | 4.8                             | —                               | 0.45                           | —                                            | 40.4<br>(0.2/0.8 bar)                       | 2         |
| SAPO-17                   | 298 K, 100 kPa | 1.7                             | 0.53                            | —                              | —                                            | —                                           | 3         |
| SAPO-43 <sup>c</sup>      | 298 K, 100 kPa | 1.07                            | 0.16                            | 0.07                           | —                                            | 15.28                                       | 4         |
| SAPO-34                   | 298 K, 100 kPa | 2.26                            | 0.4                             | —                              | 5.7<br>(0.02/0.98 bar)                       | —                                           | 5         |
| SAPO-DNL-6                | 298 K, 100 kPa | 4.65                            | 0.38                            | —                              | —                                            | —                                           | 6         |
| SAPO-RHO <sup>a</sup>     | 298 K, 100 kPa | 4.41                            | 0.83                            | 0.23                           | 26<br>(0.02/0.98 bar)                        | 50<br>(0.15/0.85 bar)                       | 7         |
| Na-SAPO-RHO <sup>a</sup>  | 298 K, 100 kPa | 3.5                             | ≈0                              | 0.09                           | 2196 (0.02/0.98 bar)                         | 196 (0.15/0.85 bar)                         | 7         |
| K-SAPO-RHO <sup>a</sup>   | 298 K, 100 kPa | 0.9                             | ≈0                              | ≈0                             | —                                            | 29 (0.15/0.85 bar)                          | 7         |
| Cs-SAPO-RHO <sup>a</sup>  | 298 K, 100 kPa | 0.5                             | ≈0                              | ≈0                             | —                                            | 22 (0.15/0.85 bar)                          | 7         |
| H-SSZ-13 <sup>a</sup>     | 298 K, 100 kPa | 3.98                            | 0.22                            | —                              | —                                            | 73.6<br>(0.15/0.75 bar)                     | 8         |
| Cu-SSZ-13 <sup>a</sup>    | 298 K, 100 kPa | 3.75                            | 0.25                            | —                              | —                                            | 72 (0.15/0.75 bar)                          | 8         |
| Fe-MOR <sup>a</sup>       | 273 K, 100 kPa | 3.89                            | 0.013                           | 0.013                          | 7.7×10 <sup>123</sup><br>(0.5/0.5 bar)       | 7.8×10 <sup>41</sup><br>(0.15/0.85 bar)     | 9         |
| 13X <sup>a</sup>          | 298 K, 100 kPa | 5                               | 0.26                            | 0.22                           | 103<br>(0.5/0.5 bar)                         | 420<br>(0.1/0.9 bar)                        | 10        |
| Mg-MOF-74 <sup>a</sup>    | 298 K, 100 kPa | 8.00                            | 1.11                            | —                              | 137<br>(0.5/0.5 bar)                         | —                                           | 10        |
| MIL-53(Al) <sup>a</sup>   | 298 K, 100 kPa | 2.23                            | 0.87                            | 0.17                           | 7<br>(0.1/0.9 bar)                           | 22.8<br>(0.15/0.85 bar)                     | 11        |
| Li-ZK-5 <sup>d</sup>      | 303K,          | 4.7                             | —                               | —                              | —                                            | 94                                          | 12        |

|                            |                   |      |       |   |                         |     |    |
|----------------------------|-------------------|------|-------|---|-------------------------|-----|----|
|                            | 100kPa            |      |       |   |                         |     |    |
| <b>Na-ZK-5<sup>d</sup></b> | 303K,<br>100kPa   | 4.0  | —     | — |                         | 56  | 12 |
| <b>K-ZK-5<sup>d</sup></b>  | 303K,<br>100kPa   | 4.0  | —     | — |                         | 96  | 12 |
| <b>Mg-ZK-5<sup>d</sup></b> | 303K,<br>100kPa   | 4.4  | —     | — |                         | 121 | 12 |
| <b>Ca-ZK-5<sup>d</sup></b> | 303K,<br>100kPa   | 4.0  | —     | — |                         | 69  | 12 |
| <b>Na-MER<sup>a</sup></b>  | 298 K,<br>100 kPa | 3.8  | 0.32  |   | 229 (0.02/0.98<br>bar)  |     | 13 |
| <b>K-MER<sup>a</sup></b>   | 298 K,<br>100 kPa | 3.57 | 0.052 |   | 1818 (0.02/0.98<br>bar) |     | 13 |

<sup>a</sup> IAST

<sup>b</sup> Relative ratio 1/1

<sup>c</sup> Single-component ratios 1/1

$$\alpha_{CO_2/N_2} = \left( \frac{N_{CO_2}}{N_{N_2}} \right) / \left( \frac{y_{N_2}}{Y_{CO_2}} \right)$$

<sup>d</sup>

## References

1. Cheung, Q. Liu, Z. Bacsik and N. Hedin, Silicoaluminophosphates as CO<sub>2</sub> sorbents, *Microporous Mesoporous Mater.*, 2012, **156**, 90–96.
2. Y. Li, H. Chen, C. Wang, Y. Ye, L. Li, X. Song and J. Yu, Achieving highly selective CO<sub>2</sub> adsorption on SAPO-35 zeolites by template-modulating the framework silicon content, *Chem. Sci.*, 2022, **13**, 5687–5692.
3. S. Zhong, N. Bu, R. Zhou, W. Jin, M. Yu and S. Li, Aluminophosphate-17 and silicoaluminophosphate-17 membranes for CO<sub>2</sub> separations, *J. Membr. Sci.*, 2016, **520**, 507–514.
4. J. Hernández-Maldonado and R. T. Yang, Partially calcined gismondine type silicoaluminophosphate SAPO-43: Isopropylamine elimination and separation of carbon dioxide, hydrogen sulfide, and water, *Langmuir*, 2003, **19**, 2193–2200.
5. R. N. Salehi, S. Sharifnia and F. Rahimpour, Natural gas upgrading by selective separation on zeotype adsorbents, *J. Nat. Gas Sci. Eng.*, 2018, **54**, 37–46.
6. X. Su, P. Tian, D. Fan, Q. Xia, Y. Yang, S. Xu, L. Zhang, Y. Zhang, D. Wang and Z. Liu, Synthesis of DNL-6 with a high concentration of Si (4Al) environments and its application in CO<sub>2</sub> separation, *ChemSusChem*, 2013, **6**, 911–918.
7. X. Wang, N. Yan, M. Xie, P. Liu, P. Bai, H. Su, B. Wang, Y. Wang, L. Li, T. Cheng, P. Guo, W. Yan and J. Yu, The inorganic cation-tailored “trapdoor” effect of silicoaluminophosphate zeolite for highly selective CO<sub>2</sub> separation, *Chem. Sci.*, 2021, **12**, 8803–8810.
8. M. R. Hudson, W. L. Queen, J. A. Mason, D. W. Fickel, R. F. Lobo and C. M. Brown, Unconventional, highly selective CO<sub>2</sub> adsorption in zeolite SSZ-13, *J. Am. Chem. Soc.*, 2012, **134**, 1970–1973.
9. Y. Zhou, J. Zhang, L. Wang, X. Cui, X. Liu, S. S. Wong, H. An, N. Yan, J. Xie, C. Yu, P. Zhang, Y. Du, S. Xi, L. Zheng, X. Cao, Y. Wu, Y. Wang, C. Wang, H. Wen, L. Chen, H. Xing and J. Wang, Self-assembled iron-containing mordenite monolith for carbon dioxide sieving, *Science*, 2021, **373**, 315–320.
10. P. Nugent, Y. Belmabkhout, S. D. Burd, A. J. Cairns, R. Luebke, K. Forrest, T. Pham, S. Ma, B. Space, L. Wojtas, M. Eddaoudi and M. J. Zaworotko, Porous materials with optimal adsorption thermodynamics and kinetics for CO<sub>2</sub> separation, *Nature*, 2013, **495**, 80–84.
11. S. Kavak, H. M. Polat, H. Kulak, S. Keskin and A. Uzun, MIL-53(Al) as a versatile

platform for ionic-liquid/MOF composites to enhance CO<sub>2</sub> selectivity over CH<sub>4</sub> and N<sub>2</sub>, *Chem. Asian J.*, 2019, **14**, 3655–3667.

12. Q. Liu, T. Pham, M. D. Porosoff and R. F. Lobo, ZK-5: A CO<sub>2</sub>-selective zeolite with high working capacity at ambient temperature and pressure, *ChemSusChem*, 2012, **5**, 2237–2242.
13. V. M. Georgieva, E. L. Bruce, M. C. Verbraeken, A. R. Scott, W. J. Casteel, S. Brandani and P. A. Wright, Triggered gate opening and breathing effects during selective CO<sub>2</sub> adsorption by merlinoite zeolite, *J. Am. Chem. Soc.*, 2019, **141**, 12744–12759.
